# Supplementary material for: A biosensing platform for sensitive detection of concanavalin A based on fluorescence resonance energy transfer from CdTe quantum dots to graphene oxide
Source: Royal Society of Chemistry journal article supplement (doi:10.1039/c5nj00942a), 2015-01-01
Supplement: c5nj00942a1.pdf [file c5nj00942a1.pdf]

## Electronic Supplementary Material

A biosensing platform for sensitive detection of concanavalin A based on fluorescence  
resonance energy transfer from CdTe quantum dots to graphene oxide

Yan Li, Fanping Shi, Nan Cai and Xingguang Su \*

Department of Analytical Chemistry, College of Chemistry, Jilin University, Changchun 130012,

China \*Corresponding author, Tel.: +86-431-85168352, E-mail address: [suxg@jlu.edu.cn](mailto:suxg@jlu.edu.cn)

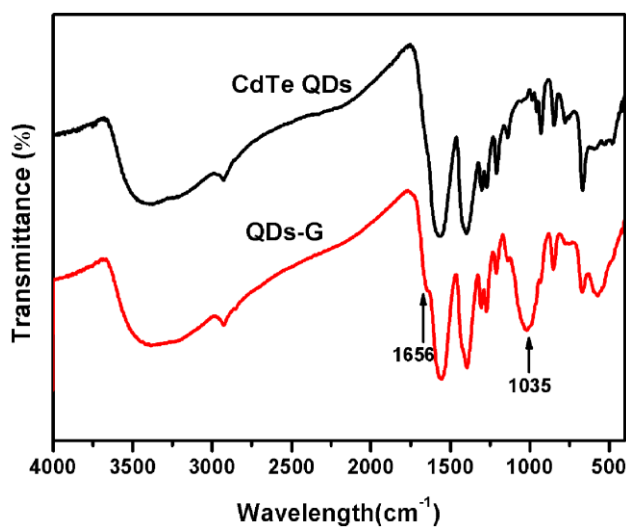

Fig. S1 FT-IR spectra of CdTe QDs and QDs-G.

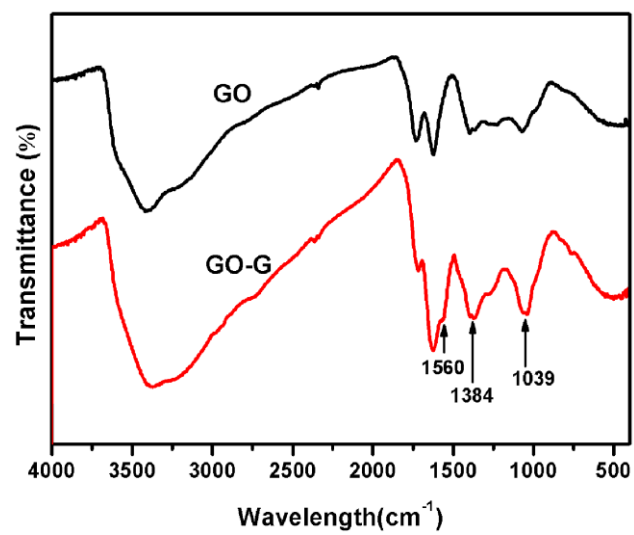

Fig. S1 FT-IR spectra of GO and GO-G.
